# Supplementary material for: Mycetoma caused by Madurella mycetomatis in immunocompromised patients – a case report and systematic literature review
Source: Copernicus journal article supplement (doi:10.5194/jbji-7-241-2022), 2022-11-21
Supplement: Supplementary file 1 [file jbji-7-241-2022-supplement.pdf]

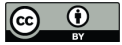

*Supplement of*

**Mycetoma caused by *Madurella mycetomatis* in immunocompromised patients – a case report and systematic literature review**

**Lotje A. Hoogervorst et al.**

*Correspondence to:* Lotje A. Hoogervorst (l.a.hoogervorst@lumc.nl)

The copyright of individual parts of the supplement might differ from the article licence.

## Supplement 1

Date: July 10, 2021. A total of 2,211 publications were identified:

- Embase: 640 papers identified.
- Emcare: 123 papers identified.
- 5 • Cochrane Library: 8 papers identified.
- Medline: 421 papers identified.
- PubMed: 406 papers identified.
- Web of Science: 613 papers identified.

10 Total amount of duplicates: 884 publications.

Total publications after removal of duplicates publications: 1,327.

### *Embase*

exp Mycetoma/ or mycetom\*.mp. or madur\*.mp. and (exp Immunocompromised Host/ or exp Immune System Diseases/ or  
15 immunocompromi\*.mp. or immunodeficient\*.mp. or exp Kidney Transplantation/ or transplant recipient\*.mp. or allograft  
recipient\*.mp. or (immun\*.mp. and (compromi\*.mp. or defici\*.mp.)))

### *Emcare*

exp Mycetoma/ or mycetom\*.mp. or madur\*.mp. and (exp Immunocompromised Host/ or exp Immune System Diseases/ or  
20 immunocompromi\*.mp. or immunodeficient\*.mp. or exp Kidney Transplantation/ or transplant recipient\*.mp. or allograft  
recipient\*.mp. or (immun\*.mp. and (compromi\*.mp. or defici\*.mp.)))

### *Cochrane Library*

"Immunocompromised Host" or "Immune System Diseases" or "immunocompromi\*" or "immunodeficient\*" or "Kidney  
25 Transplantation" or "transplant recipient\*" or "allograft recipient\*" or "immun\*" and "compromi\*" or "defici\*" in Title Abstract  
Keyword AND "Mycetoma" or "mycetom\*" or "madur\*" in Title Abstract Keyword

### *Medline*

exp Mycetoma/ or mycetom\*.mp. or madur\*.mp.) and (exp Immunocompromised Host/ or exp Immune System Diseases/ or  
30 immunocompromi\*.mp. or immunodeficient\*.mp. or exp Kidney Transplantation/ or transplant recipient\*.mp. or allograft  
recipient\*.mp. or (immun\*.mp. and (compromi\*.mp. or defici\*.mp.)))

*PubMed*

35 ("Mycetoma"[Mesh] OR mycetom\*[tw] OR madur\*[tw]) AND ("Immunocompromised Host"[Mesh] OR "Immune System Diseases"[Mesh] OR immunocompromi\*[tw] OR immunodeficient\*[tw] OR "Kidney Transplantation"[Mesh] OR "transplant recipient\*[tw] OR "allograft recipient\*[tw] OR (immun\*[tw] AND (compromi\*[tw] OR deficient\*[tw])))

*Web of Science*

40 ``Mycetoma`` or ``mycetom\*`` or ``madur\*`` and "Immunocompromised Host" or "Immune System Diseases" or "immunocompromi\*" or "immunodeficient\*" or "Kidney Transplantation" or "transplant recipient\*" or "allograft recipient\*" or "immun\*" and "compromi\*" or "deficient\*"
